# Supplementary material
Source: publisher figshare collection journal article supplement (https://tandf.figshare.com/articles/dataset/_/17056307)

## Supplementary Movies for “Nonparametric Estimation and Inference for Spatiotemporal Epidemic Models”

The estimation results below are based on a 28-day window model fit from March 16 to September 3, 2020.

- Supplementary Movies 1-12 show the estimates and simultaneous confidence bands (SCBs) of the  $\gamma_k^I$ 's in the STEM Infection Model, in which the central black lines show the estimate of the functions and grey bands represent the 95% SCB.
- Supplementary Movies 13-14 show the estimated maps of the varying coefficient functions  $\hat{\beta}_0^I$  and  $\hat{\beta}_1^I$  in the STEM Infection Model.
- Supplementary Movie 15 shows the estimated map of the varying coefficient function  $\hat{\beta}_0^D$  in the STEM Death Model.

# Supplementary Movie 1 | Infection Model

## Percent of African American population (AA)

# Supplementary Movie 2 | Infection Model

## Percent of Hispanic or Latino population (HL)



# Supplementary Movie 3 | Infection Model

## Population density per mile<sup>2</sup> of land area (PD\*)

# Supplementary Movie 4 | Infection Model

## Aged people rate per population (Old)

# Supplementary Movie 5 | Infection Model

## Ratio of male over female (Sex)

# Supplementary Movie 6 | Infection Model

## Social affluence (Affluence)

# Supplementary Movie 7 | Infection Model

## Concentrated disadvantage (Disadvantage)

# Supplementary Movie 8 | Infection Model

## Gini coefficient (Gini)

# Supplementary Movie 9 | Infection Model

## Percent of people without health insurance (NHIC)

# Supplementary Movie 10 | Infection Model

## Government health expenditures per capita (EHPC)



# Supplementary Movie 11 | Infection Model

## Total bed counts per 1000 population (Tbed\*)

# Supplementary Movie 12 | Infection Model

## Urban rate (Urban)

# Supplementary Movie 13 | Infection Model

## Estimated coefficient function map ( $\hat{\beta}_0^I$ ).

# Supplementary Movie 14 | Infection Model

## Estimated coefficient function map ( $\hat{\beta}_1^I$ ).

# Supplementary Movie 15 | Death Model

## Estimated coefficient function map ( $\hat{\beta}_0^D$ ).

# Supplementary Figure 1 | Infection Model

## Root mean squared errors (RMSEs) of the estimated coefficient $\hat{\beta}_0^I$ .

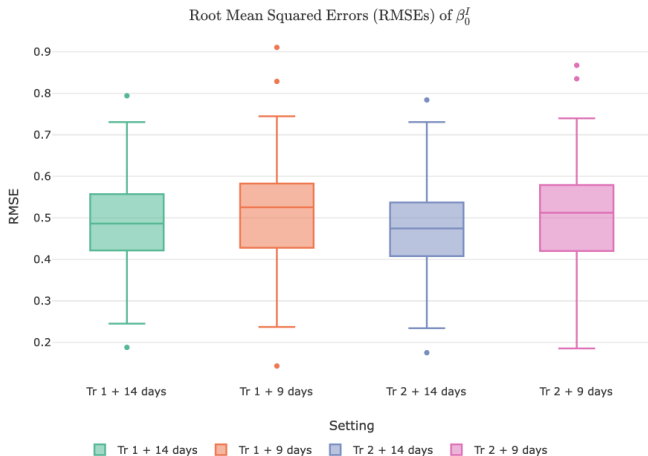

# Supplementary Figure 2 | Infection Model

## Root mean squared errors (RMSEs) of the estimated coefficient $\hat{\beta}_1^I$ .

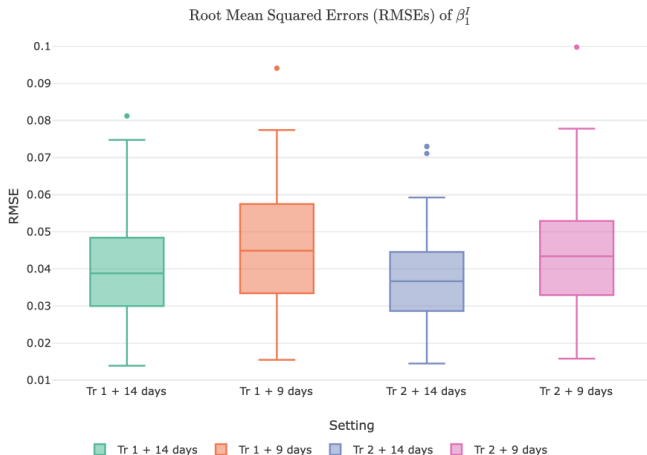

# Supplementary Figure 3| Infection Model

## Root mean squared errors (RMSEs) of the estimated coefficient $\hat{\alpha}_1^I$ (mobility).

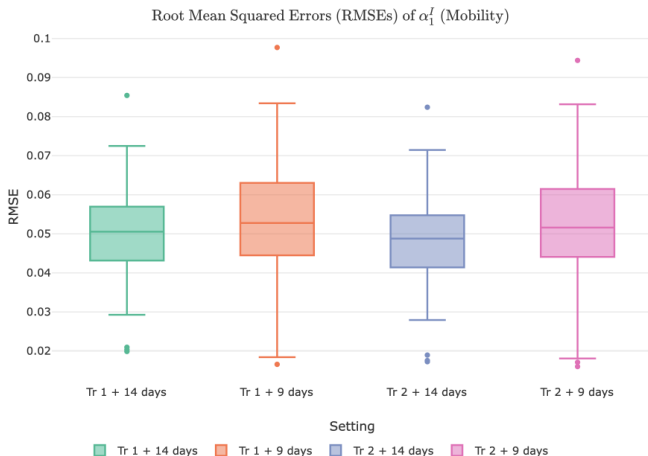



# Supplementary Figure 4 | Infection Model

## Root mean squared errors (RMSEs) of the estimated coefficient $\hat{\alpha}_2^I$ ('shelter-in-place' order).

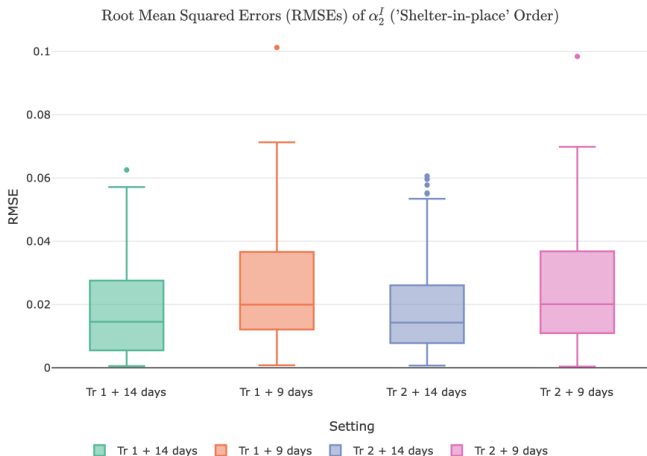

# Supplementary Figure 5| Infection Model

## Root mean squared errors (RMSEs) of the estimated coefficient $\hat{\gamma}_1^I$ (percent of Hispanic or Latino population).

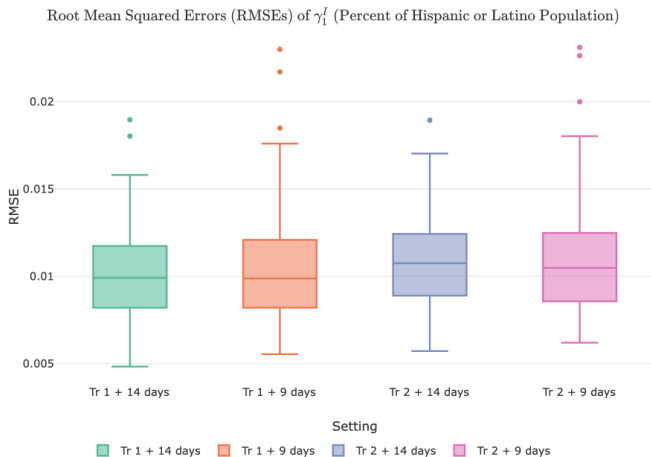

# Supplementary Figure 6 | Infection Model

## Root mean squared errors (RMSEs) of the estimated coefficient $\hat{\gamma}_2^I$ (population density).

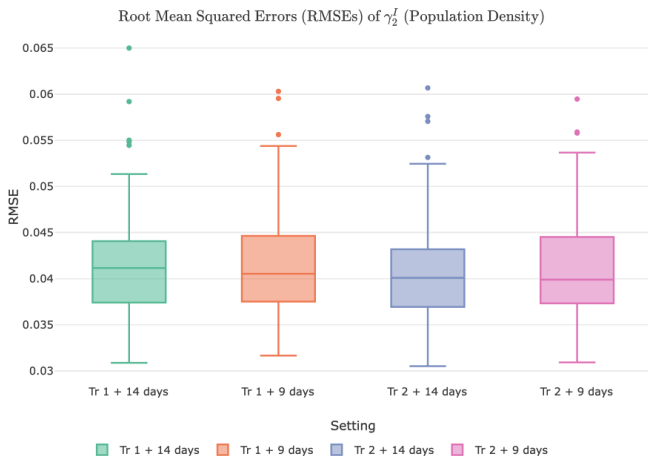

# Supplementary Figure 7 | Infection Model

## Root mean squared errors (RMSEs) of the estimated coefficient $\hat{\gamma}_3^I$ (total bed counts per 1000 population).

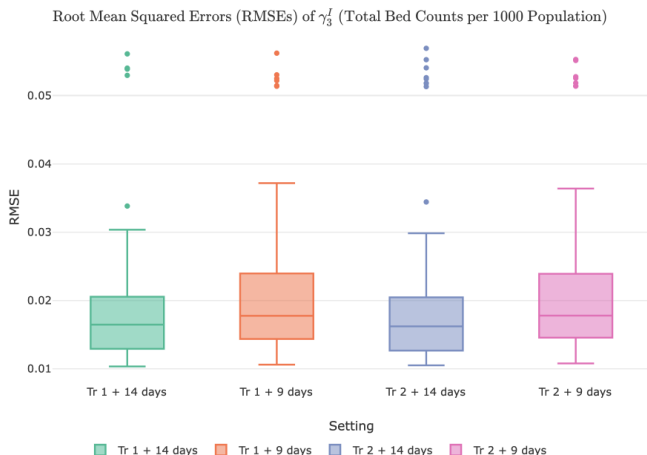

# Supplementary Figure 8 | Infection Model

## Root mean squared errors (RMSEs) of the estimated coefficient $\hat{\gamma}_4^I$ (government health expenditures per capita).

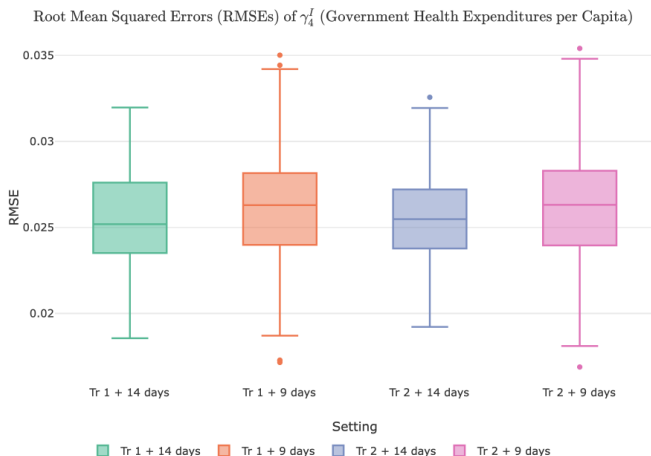

# Supplementary Figure 9 | Infection Model

Root mean squared errors (RMSEs) of the estimated coefficient  $\hat{\gamma}_5^I$  (percent of African American population).

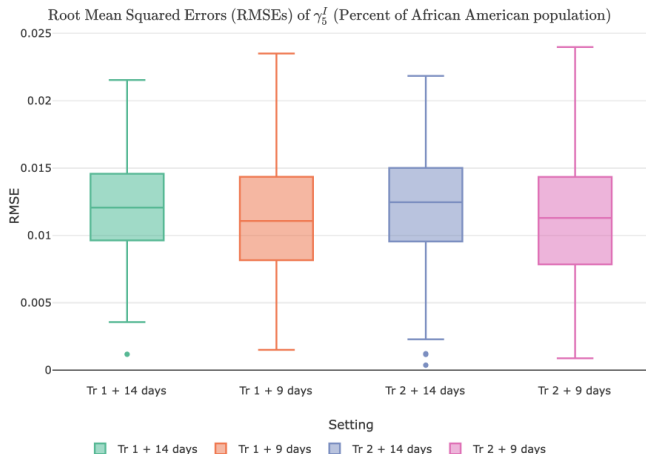

# Supplementary Figure 10 | Infection Model

## Root mean squared errors (RMSEs) of the estimated component $\hat{a}_1$ .

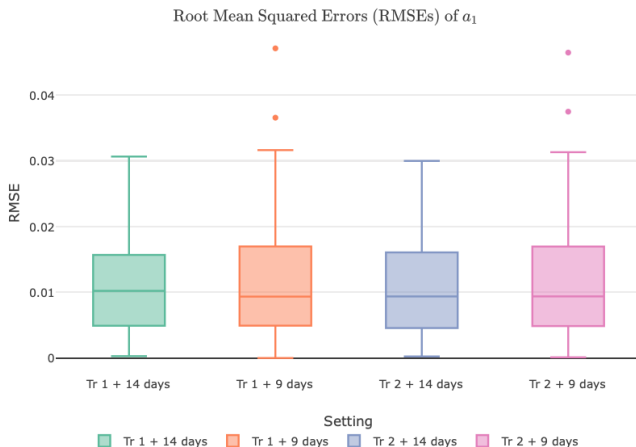

# Supplementary Figure 11 | Infection Model

## Root mean squared errors (RMSEs) of the estimated component $\hat{a}_2$ .

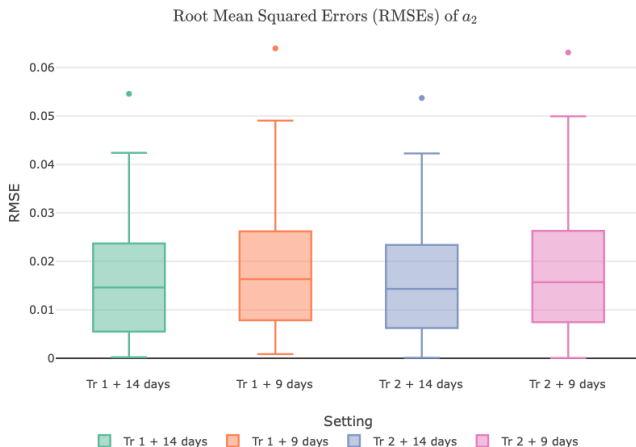



# Supplementary Figure 12 | Death Model

## Root mean squared errors (RMSEs) of the estimated coefficient $\hat{\beta}_0^D$ .

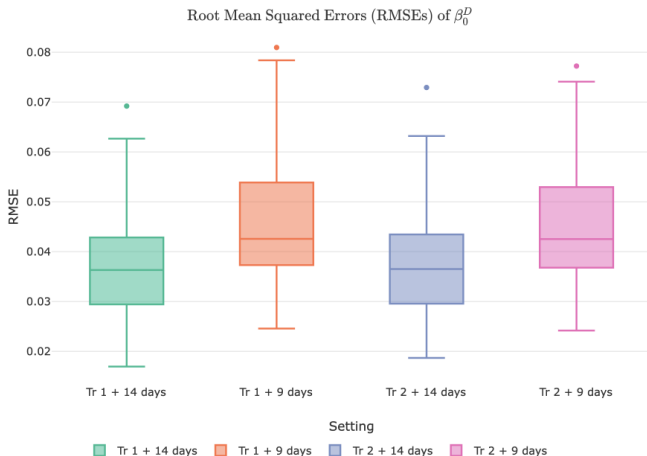

# Supplementary Figure 13 | Death Model

## Root mean squared errors (RMSEs) of the estimated coefficient $\hat{\beta}_1^D$ .

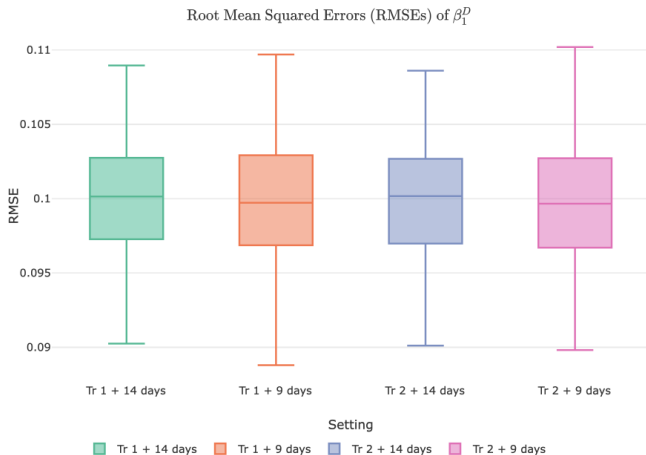

# Supplementary Figure 14 | Death Model

## Root mean squared errors (RMSEs) of the estimated component $\hat{v}_1$ .

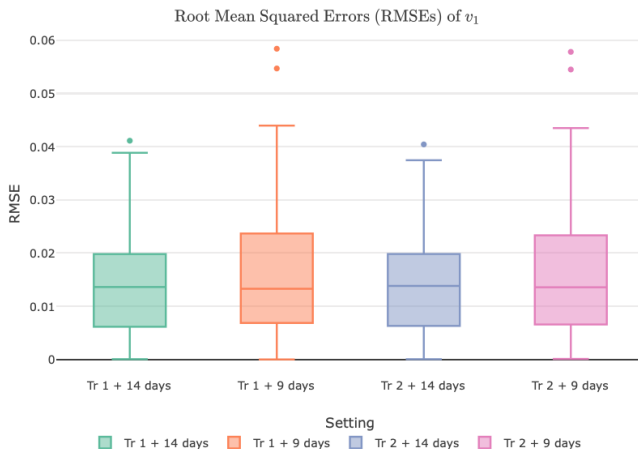

# Supplementary Figure 15 | Death Model

## Root mean squared errors (RMSEs) of the estimated component $\hat{v}_2$ .

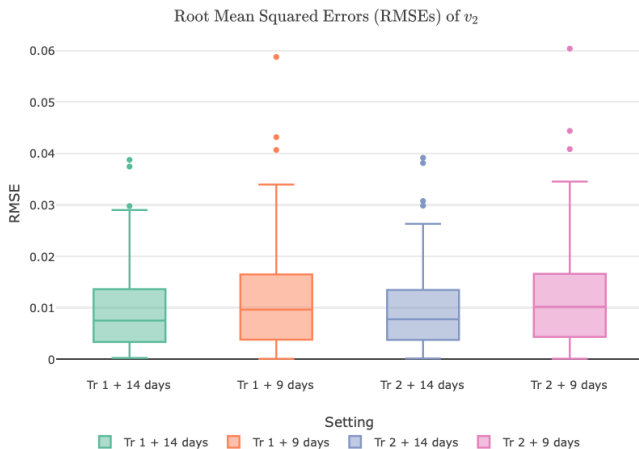

Supplement: Supplementary file 2 [file 1]
